# Supplementary material for: Agent-based modeling to estimate impact of parameters like events on a pandemic exemplified on Sars-CoV-2
Source: Research Square preprint supplement (doi:10.21203/rs.3.rs-2732968/v1), 2023-04-13
Supplement: Supplementary file 1 [file 45929d1be5318de7a60619b0.pdf]

# **Supplementary Material**

## **Agent-based modeling to estimate impact of parameters like events on a pandemic exemplified on Sars-CoV-2**

Published in  
Scientific Reports

Authors  
Christian Nitzsche and Stefan Simm  
University Medicine of Greifswald

Institute of Bioinformatics  
University Medicine Greifswald  
17475 Greifswald  
stefan.simm@uni-greifswald.de

## Estimating the Upper Limit $\alpha$ of Contacts for Multispreaders

Normal Spreaders and Multispreaders are distinguished in the model via a different amount of contacts. To ensure that Multispreaders are responsible for 80% of all infections we let them have 80% of all occurring contacts during a simulation, making all contacts the same probability of causing an infection. Multispreaders can have contact to multiple other agents at the same place, limited by a parameter  $\alpha$  as the upper limit of possible contacts per timestep. By running simulations for different upper limits of contacts we could identify a value of  $\alpha = 72$  as the maximum number of contacts per timestep for multispreaders to ensure that multispreaders are responsible for 80% of all infections.

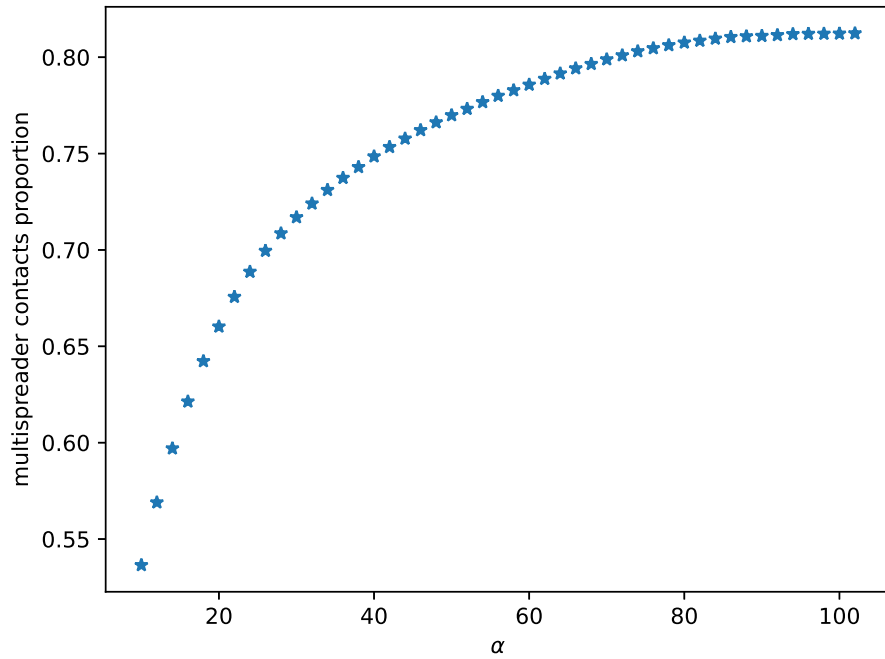

Supp. Figure 1: Proportion of multispreader contacts in dependence of an upper limit  $\alpha$  of contacts for multispreaders per timestep.

## Estimating the Infection Probability $p_0$

For estimating the infection probability in our model we ran simulations for different infection probabilities  $p_0$  and used the observed infections to calculate a basis reproductive number  $R_0$  for the pre lockdown phase. We observed a linear relationship (at least for  $R_0 \leq 4.5$  and used a linear regression model to obtain a final value for  $R_0$ .

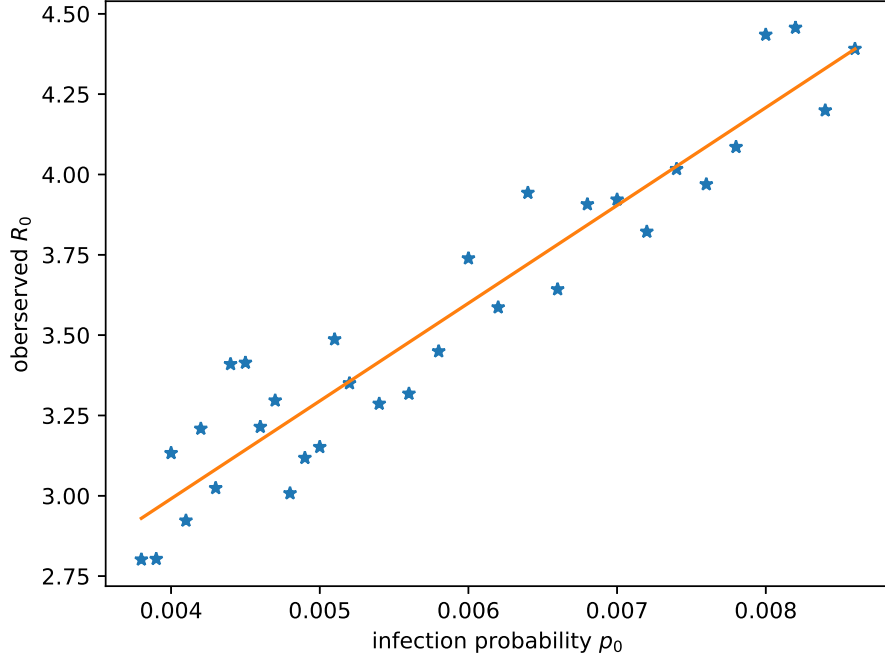

Supp. Figure 2: Observed basis reproductive number  $R_0$  for a given infection probability.

## Estimating the Social Distancing Parameter $\kappa$

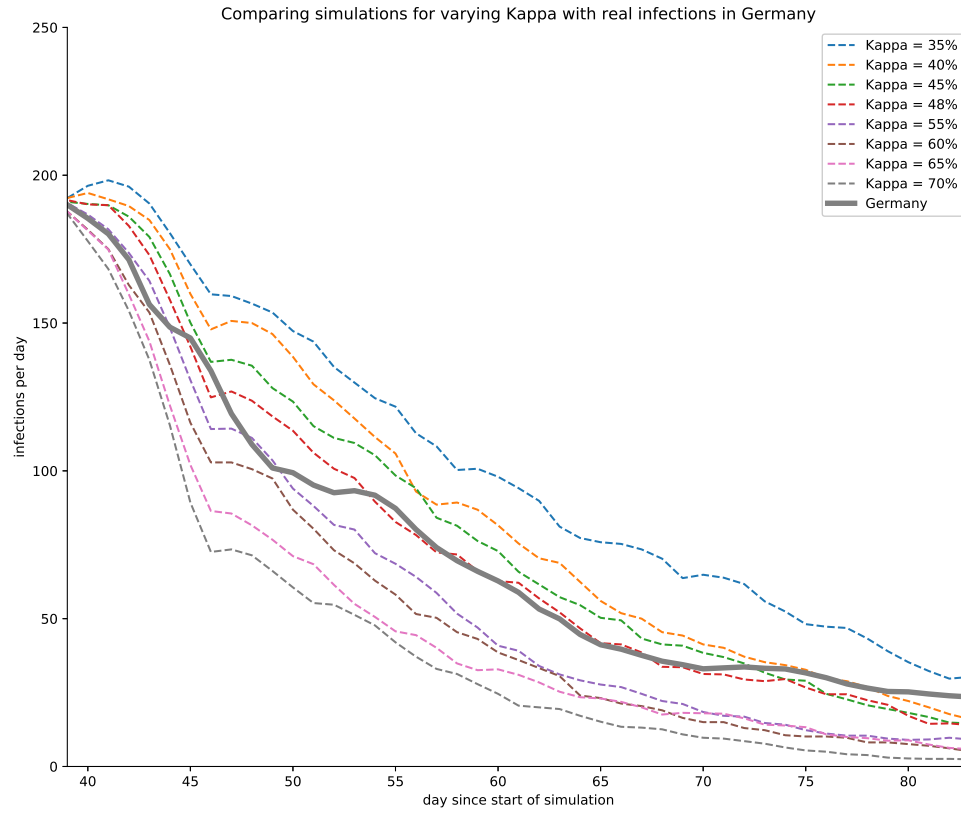

Supp. Figure 3: Least squares approach to estimate an optimal value for  $\kappa$  during the first lockdown period in Germany from March til May 2020.

## Urban Districts and Cities

| District       | Population | District   | Population |
|----------------|------------|------------|------------|
| Bottrop        | 117.311    | Pforzheim  | 125.529    |
| Cottbus        | 98.359     | Remscheid  | 111.770    |
| Erlangen       | 113.292    | Salzgitter | 103.694    |
| Flensburg      | 91.113     | Schwerin   | 95.740     |
| Fürth          | 129.122    | Trier      | 110.570    |
| Heilbronn      | 125.613    | Ulm        | 126.949    |
| Jena           | 110.502    | Wolfsburg  | 123.949    |
| Kaiserslautern | 99.292     | Würzburg   | 126.933    |
| Koblenz        | 113.638    |            |            |

Supp. Table 1: Selection of german urban districts with about 100.000 citizens. Populations are as of 31.12.2021.

## Boxplots to visualize how many days are needed until a given percentage of the population get infected

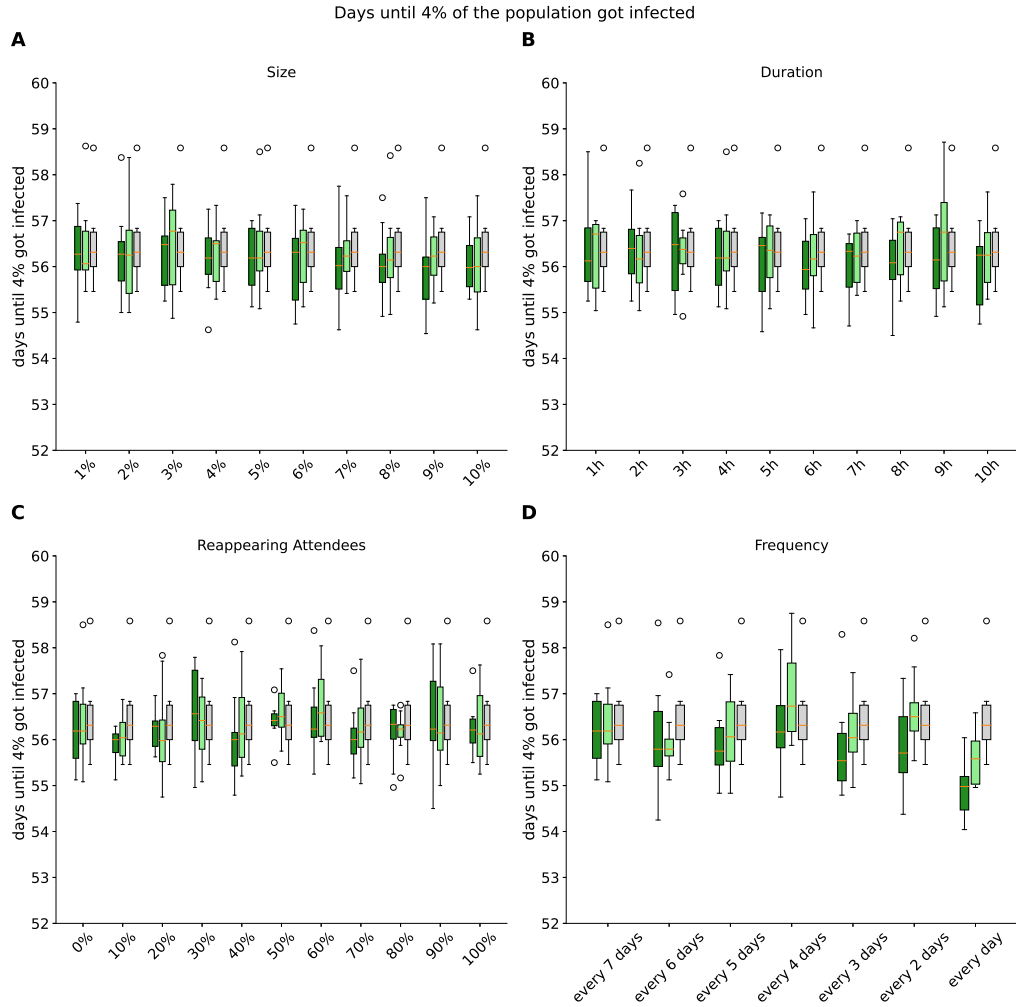

Supp. Figure 4: (A-D) Box-Whisker-Plots represent distribution of amount of days until 4% of agents got infected within 10 simulation runs with different random seeds. (A) size of the event, (B) time of the event, (C) percentage of reappearing attendees, (D) frequency of events per week. Coloring of boxplots show the different lockdown scenarios (dark green: events without mask, light green: events with masks, grey: no events).

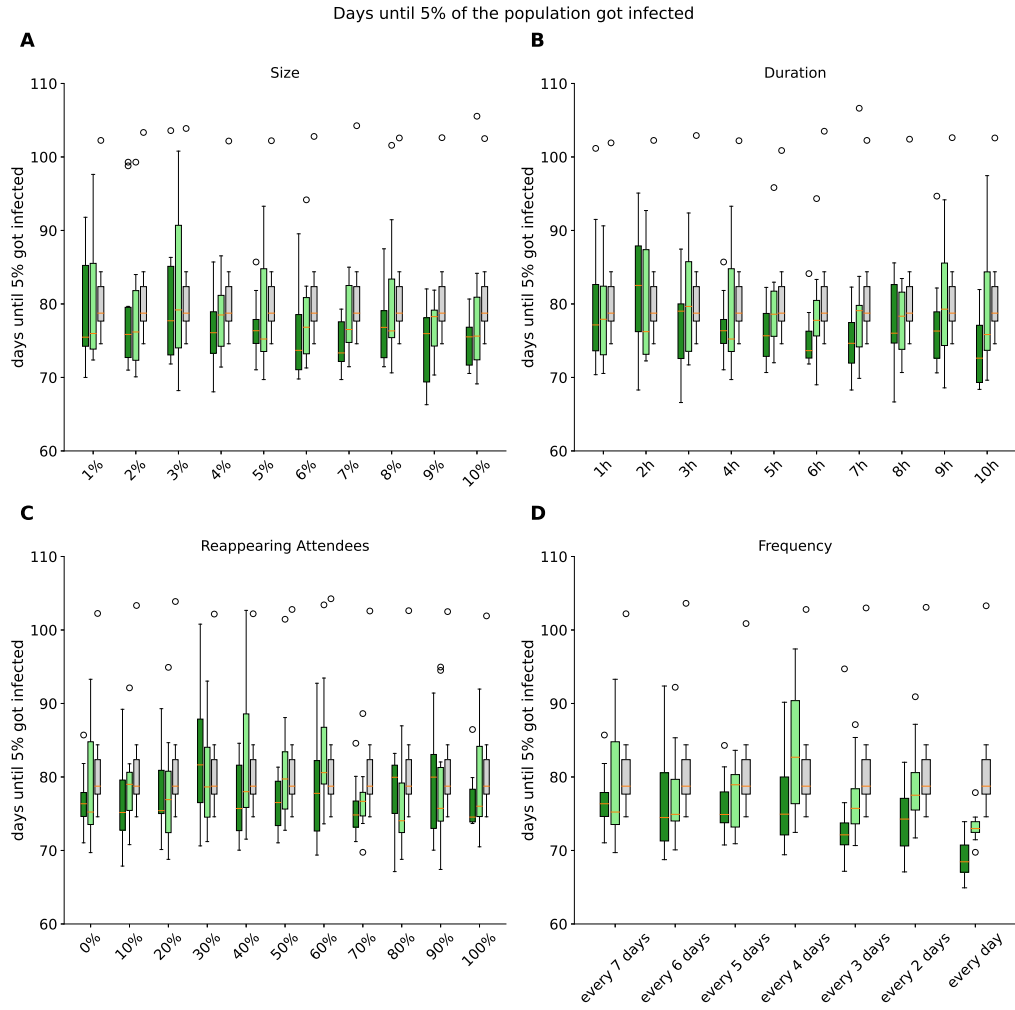

Supp. Figure 5: (A-D) Box-Whisker-Plots represent distribution of amount of days until 5% of agents got infected within 10 simulation runs with different random seeds. (A) size of the event, (B) time of the event, (C) percentage of reappearing attendees, (D) frequency of events per week. Coloring of boxplots show the different lockdown scenarios (dark green: events without mask, light green: events with masks, grey: no events).

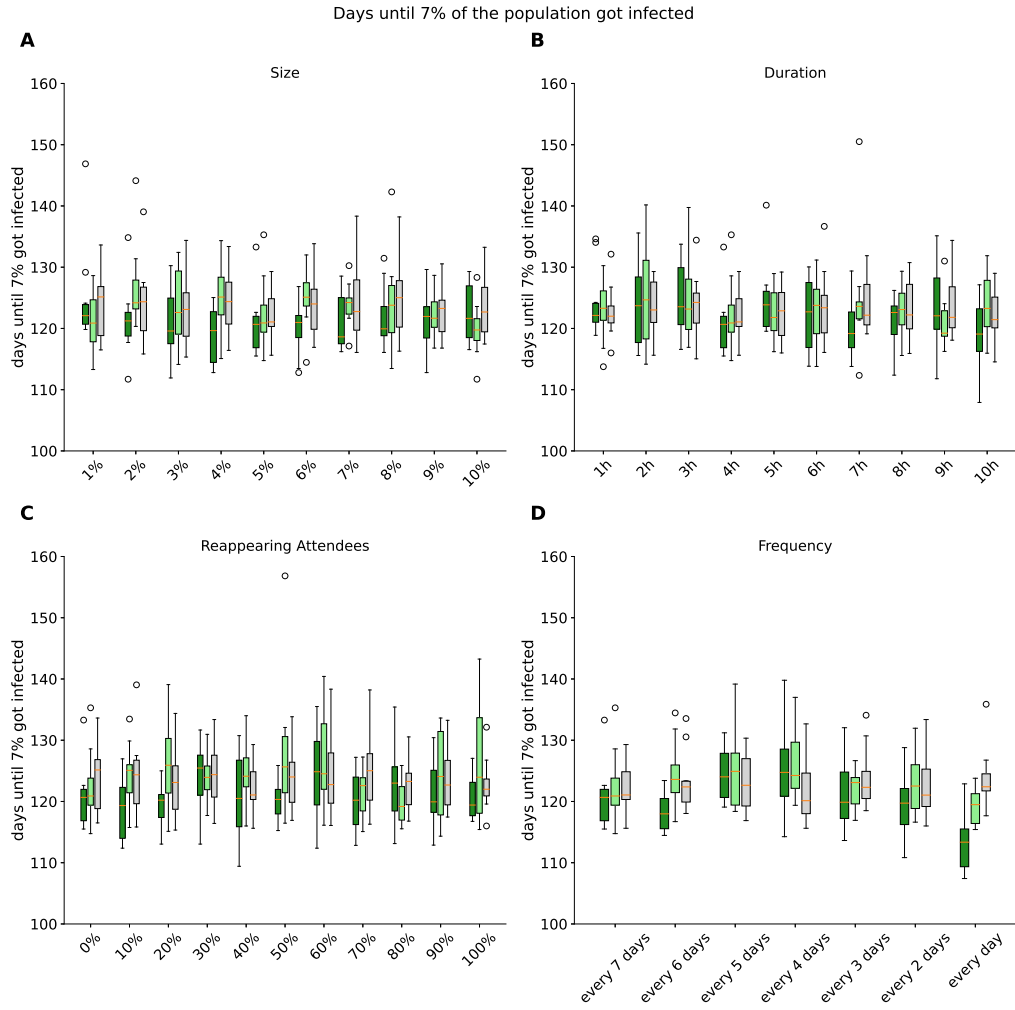

Supp. Figure 6: (A-D) Box-Whisker-Plots represent distribution of amount of days until 7% of agents got infected within 10 simulation runs with different random seeds. (A) size of the event, (B) time of the event, (C) percentage of reappearing attendees, (D) frequency of events per week. Coloring of boxplots show the different lockdown scenarios (dark green: events without mask, light green: events with masks, grey: no events).



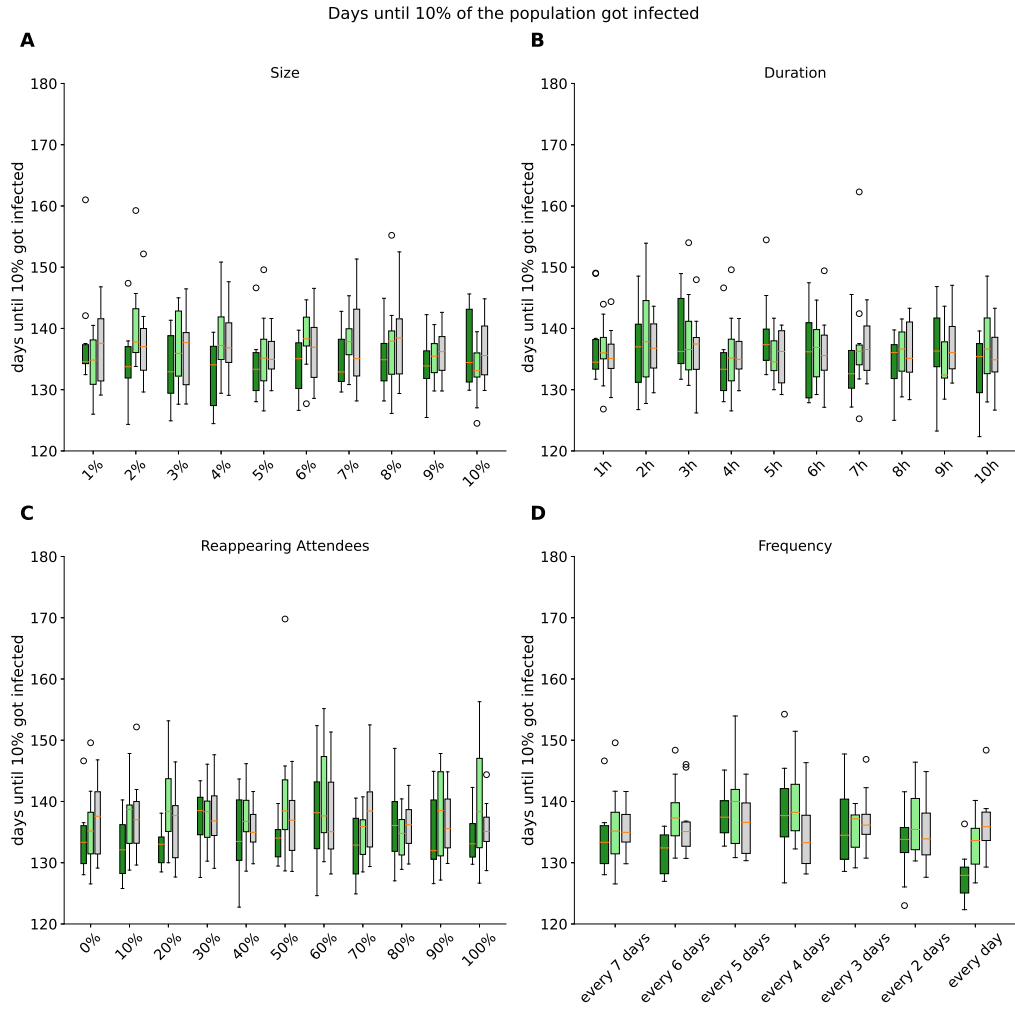

Supp. Figure 7: (A-D) Box-Whisker-Plots represent distribution of amount of days until 10% of agents got infected within 10 simulation runs with different random seeds. (A) size of the event, (B) time of the event, (C) percentage of reappearing attendees, (D) frequency of events per week. Coloring of boxplots show the different lockdown scenarios (dark green: events without mask, light green: events with masks, grey: no events).

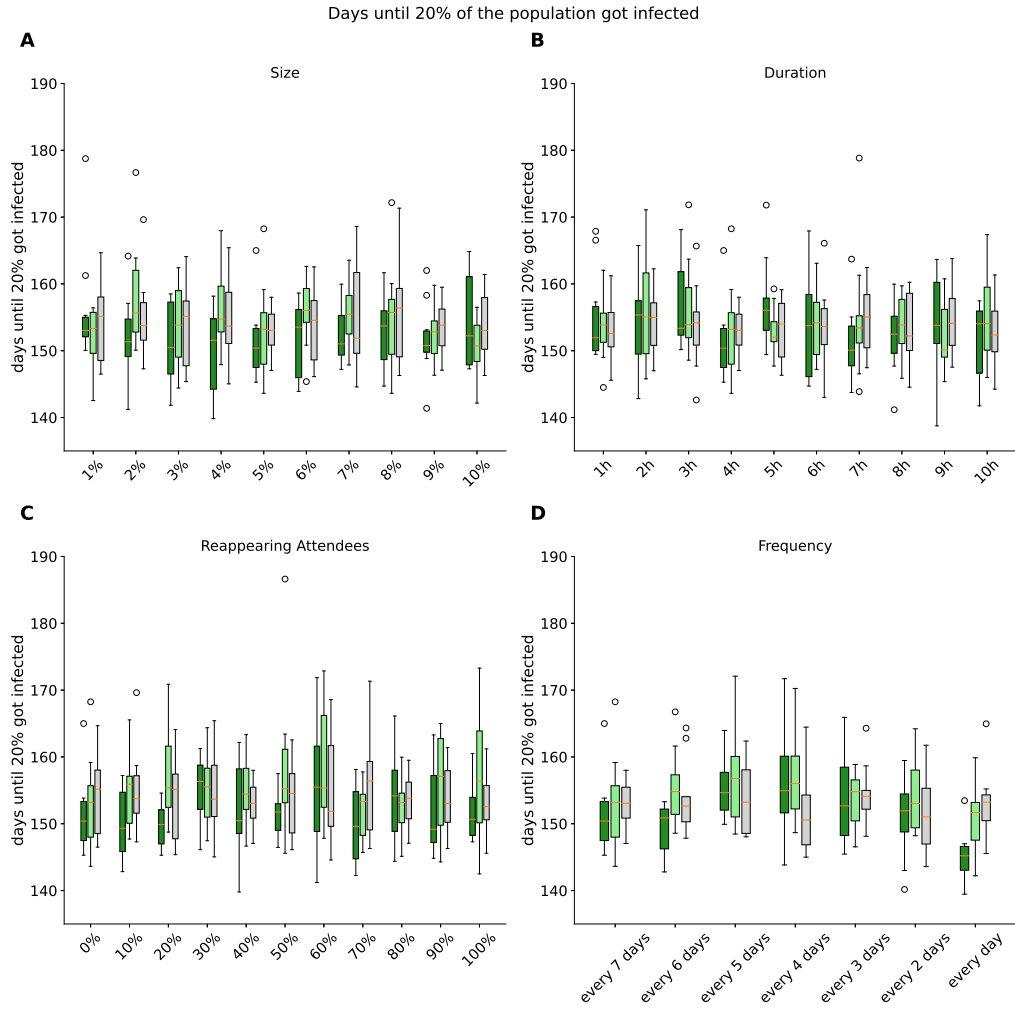

Supp. Figure 8: (A-D) Box-Whisker-Plots represent distribution of amount of days until 20% of agents got infected within 10 simulation runs with different random seeds. (A) size of the event, (B) time of the event, (C) percentage of reappearing attendees, (D) frequency of events per week. Coloring of boxplots show the different lockdown scenarios (dark green: events without mask, light green: events with masks, grey: no events).

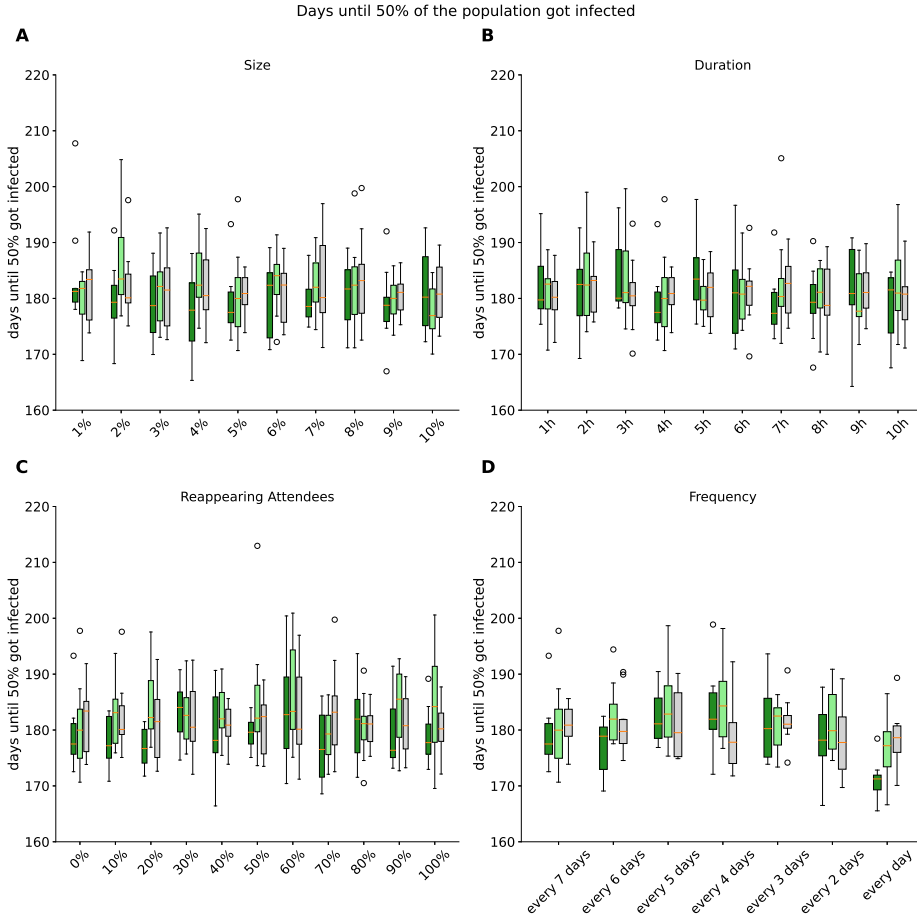

Supp. Figure 9: (A-D) Box-Whisker-Plots represent distribution of amount of days until 50% of agents got infected within 10 simulation runs with different random seeds. (A) size of the event, (B) time of the event, (C) percentage of reappearing attendees, (D) frequency of events per week. Coloring of boxplots show the different lockdown scenarios (dark green: events without mask, light green: events with masks, grey: no events).

## Statistical Analysis

We performed an ANOVA test for a fixed masking situation (wearing masks / not wearing masks) and varying the parameters Size, Duration, Composition and Frequency. Afterwards we performed a Tukey post-hoc test for pairwise comparisons for event parameter changes.

## Frequency

ANOVA p-value: 0.031 / 0.029 (wearing masks / not wearing masks)

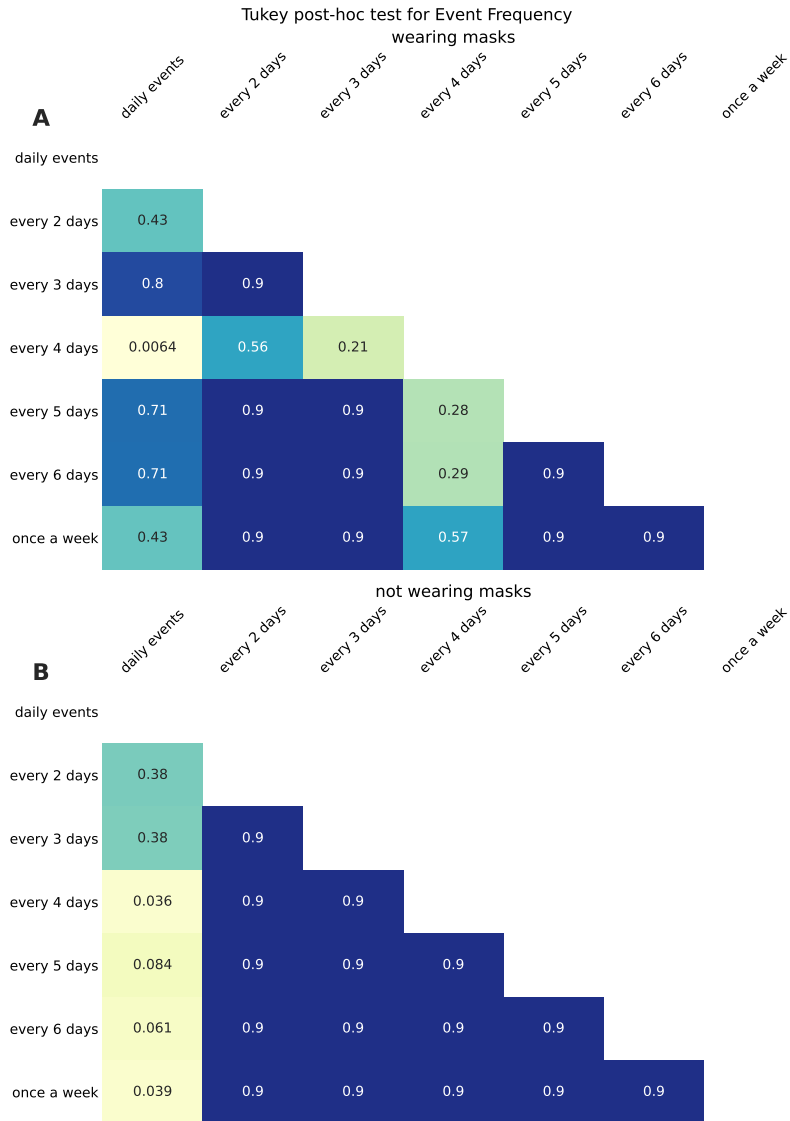

Supp. Figure 10: Pairwise Tukey post-hoc test. Adjusted p-values are shown for the scenarios (A) Event frequency was varied and agents are wearing masks, (B) Event frequency was varied and agents are not wearing masks.

## Size

ANOVA p-value: 0.945 / 0.395 (wearing masks / not wearing masks)

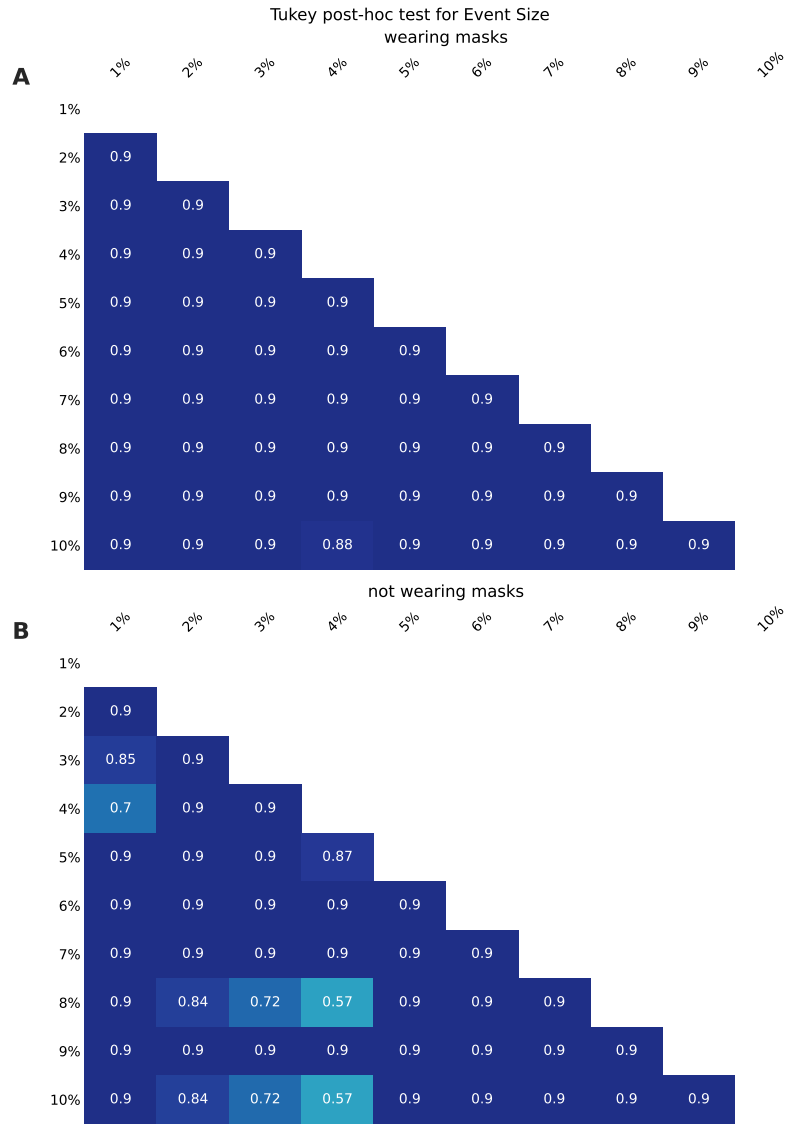

Supp. Figure 11: Pairwise Tukey post-hoc test. Adjusted p-values are shown for the scenarios (A) Event size was varied and agents are wearing masks, (B) Event size was varied and agents are not wearing masks.

## Duration

ANOVA p-value: 0.999 / 0.108 (wearing masks / not wearing masks)

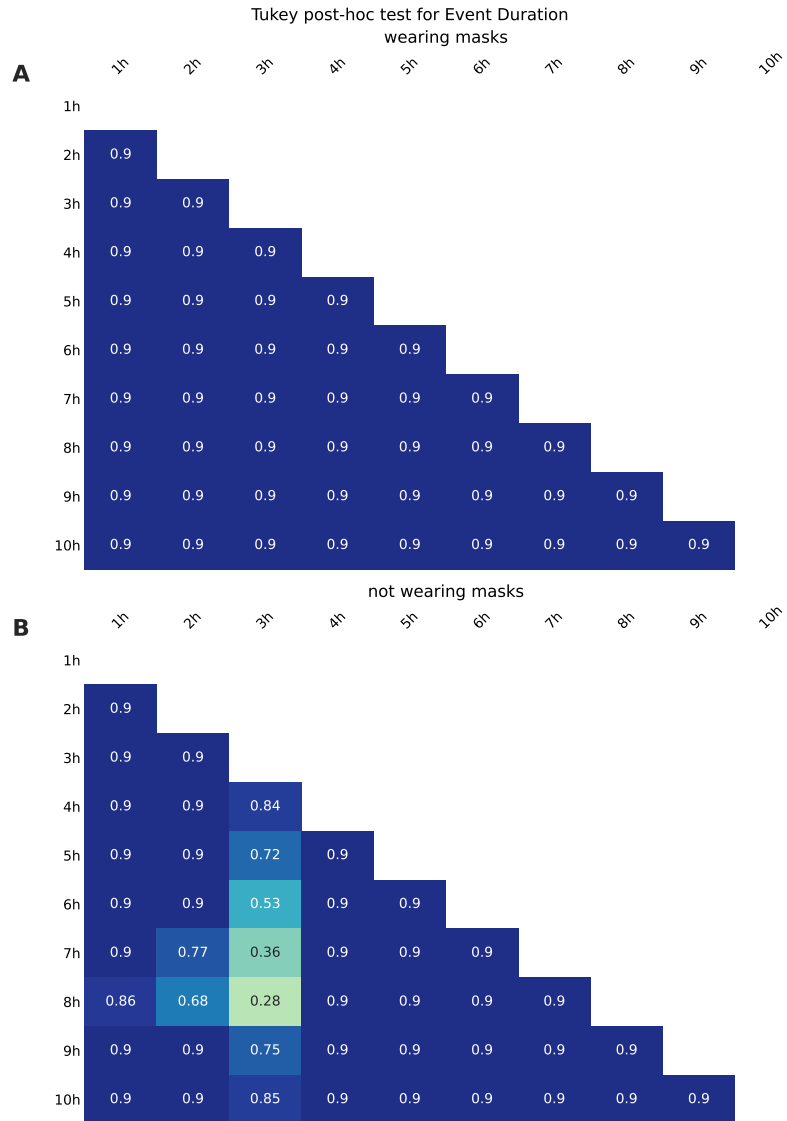

Supp. Figure 12: Pairwise Tukey post-hoc test. Adjusted p-values are shown for the scenarios (A) Event duration was varied and agents are wearing masks, (B) Event duration was varied and agents are not wearing masks.

## Composition

ANOVA p-value: 0.649 / 0.397 (wearing masks / not wearing masks)

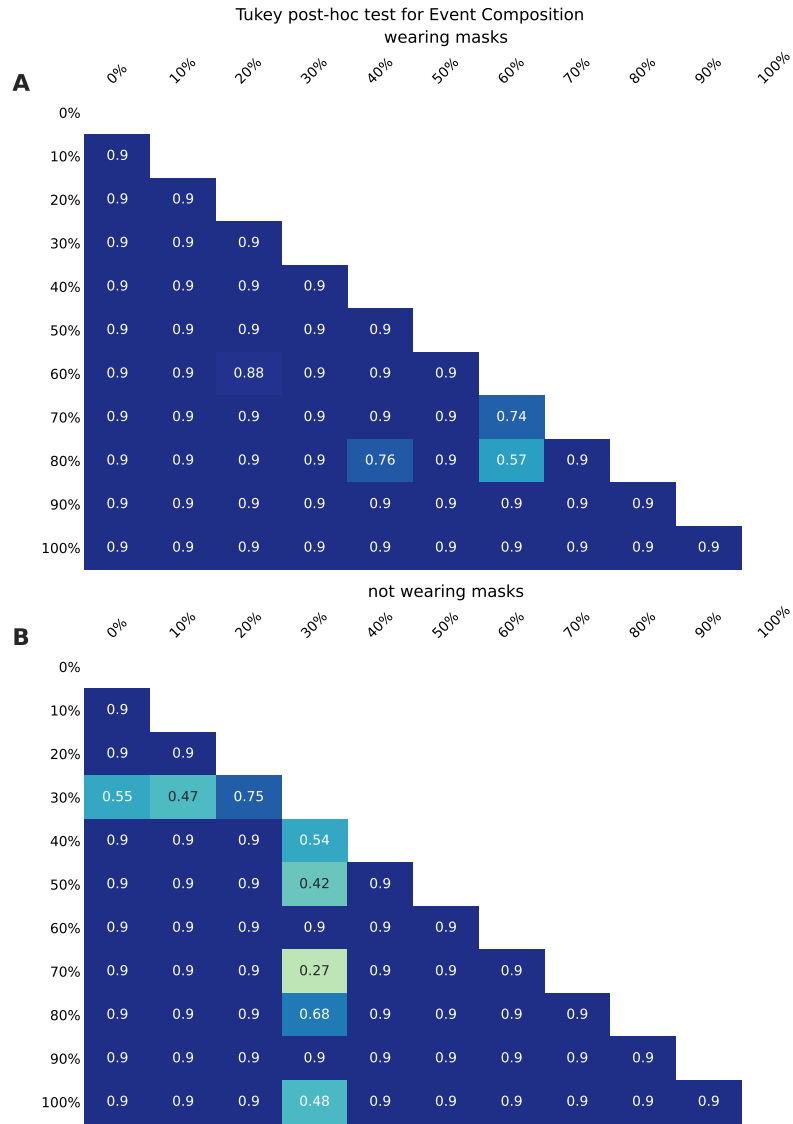

Supp. Figure 13: Pairwise Tukey post-hoc test. Adjusted p-values are shown for the scenarios (A) Proportion of reappearing attendees was varied and agents are wearing masks, (B) Proportion of reappearing attendees was varied and agents are not wearing masks.
